# Supplementary material for: In Vitro Drug Screening Using iPSC-Derived Cardiomyocytes of a Long QT-Syndrome Patient Carrying KCNQ1 & TRPM4 Dual Mutation: An Experimental Personalized Treatment
Source: Cells. 2022 Aug 11;11(16):2495. doi: 10.3390/cells11162495 (PMC9406448; doi:10.3390/cells11162495)
Supplement: Supplementary file 1 [file cells-11-02495-s001.zip]

Archive with 9 entries (9 files):
- Figure S1.tif
- Figure S2.tif
- Figure S3.tif
- Figure S4.tif
- Figure S5.tif
- Figure S6.tif
- Supplementary Figure Legend (Fig. S1~S6).pdf
- Supplementary Tables.pdf
- supplementary video S1.mp4
