# Supplementary material for: In Vitro Drug Screening Using iPSC-Derived Cardiomyocytes of a Long QT-Syndrome Patient Carrying KCNQ1 & TRPM4 Dual Mutation: An Experimental Personalized Treatment
Source: Cells. 2022 Aug 11;11(16):2495. doi: 10.3390/cells11162495 (PMC9406448; doi:10.3390/cells11162495)
Supplement: Supplementary file 1 [file cells-11-02495-s001.zip › Supplementary Tables.pdf]

**Supplementary Table S1: Symptoms and Treatment Outcomes of Dual Mutation Long QT Patient**

| Time      | Symptoms                                                                                                                                                                                                                                                                                                                     | Treatments                                                                                                                                                                                                                                                                                                                                                                                                                                                                                                                                                                                                                                                                          | Outcomes & Remarks                                                                                                                                                                                                                                       |
|-----------|------------------------------------------------------------------------------------------------------------------------------------------------------------------------------------------------------------------------------------------------------------------------------------------------------------------------------|-------------------------------------------------------------------------------------------------------------------------------------------------------------------------------------------------------------------------------------------------------------------------------------------------------------------------------------------------------------------------------------------------------------------------------------------------------------------------------------------------------------------------------------------------------------------------------------------------------------------------------------------------------------------------------------|----------------------------------------------------------------------------------------------------------------------------------------------------------------------------------------------------------------------------------------------------------|
| 2012      | Palpitation<br><br>Other symptoms like seizure or chest tightness were not observed                                                                                                                                                                                                                                          | Symptom relief treatment only                                                                                                                                                                                                                                                                                                                                                                                                                                                                                                                                                                                                                                                       | LQTS diagnosis not yet made                                                                                                                                                                                                                              |
| Oct, 2016 | Hospitalized with the following symptoms:<br><ul style="list-style-type: none"> <li>◆ Palpitation</li> <li>◆ Seizure</li> <li>◆ Chest tightness</li> <li>◆ Sweating</li> <li>◆ Arrhythmia</li> <li>◆ Ventricular fibrillation</li> </ul>                                                                                     | <p>Emergency treatment</p> <ul style="list-style-type: none"> <li>◆ Cardiopulmonary resuscitation</li> <li>◆ Defibrillation</li> </ul> <p>Medication</p> <ul style="list-style-type: none"> <li>◆ Metoprolol (23.75 mg → 47.5 mg per day oral)</li> <li>◆ Esmolol (1 g in 50 mL, 2 mL/hr IV)</li> </ul> <p>Device Treatment</p> <ul style="list-style-type: none"> <li>◆ ICD implantation</li> </ul> <p>Medication after ICD Implantation</p> <ul style="list-style-type: none"> <li>◆ Propranolol (20 mg, 3 times per day oral)</li> </ul> <p>Medication after patient discharge</p> <ul style="list-style-type: none"> <li>◆ Propranolol (20 mg, 3 times per day oral)</li> </ul> | <p>LQTS diagnosis was made</p> <p>Initial treatment using Metoprolol and Esmolol was not effective even after increasing the dose of Metoprolol</p> <p>Patient stabilized only after ICD implantation and adding Propranolol to the treatment regime</p> |
| Feb, 2017 | Hospitalized for multiple times with the following symptoms:<br><ul style="list-style-type: none"> <li>◆ Palpitation</li> <li>◆ Seizure</li> <li>◆ Chest tightness</li> <li>◆ Sweating</li> <li>◆ Arrhythmic storm</li> <li>◆ Loss of consciousness</li> </ul> <p>Frequent ICD discharging and arrhythmic storm recorded</p> | <p>Medication</p> <ul style="list-style-type: none"> <li>◆ Metoprolol (47.5 mg per day oral)</li> <li>◆ Esmolol (1 g in 45 mL, 5 mL/hr IV)</li> <li>◆ Propranolol (40 mg, 3 times per day oral)</li> <li>◆ Amiodarone (450 mg in 41 mL, 9 mL/hr, IV)</li> </ul> <p>Medication after patient discharge</p> <ul style="list-style-type: none"> <li>◆ Propranolol</li> </ul>                                                                                                                                                                                                                                                                                                           | <p>Patient quality of life was severely deteriorated due to symptom relapse, frequent ICD discharging and arrhythmic storm</p>                                                                                                                           |

|             |                                                                                                                                                                                                                            |                                                                                                                                                                                                                                                                                                                                                                                                                                                                                                                                                                  |                                                                                                                                                     |
|-------------|----------------------------------------------------------------------------------------------------------------------------------------------------------------------------------------------------------------------------|------------------------------------------------------------------------------------------------------------------------------------------------------------------------------------------------------------------------------------------------------------------------------------------------------------------------------------------------------------------------------------------------------------------------------------------------------------------------------------------------------------------------------------------------------------------|-----------------------------------------------------------------------------------------------------------------------------------------------------|
|             |                                                                                                                                                                                                                            | (40 mg, 3 times per day oral)                                                                                                                                                                                                                                                                                                                                                                                                                                                                                                                                    |                                                                                                                                                     |
| Aug, 2017   | <p>Hospitalized for multiple times with the following symptoms:</p> <ul style="list-style-type: none"> <li>◆ Palpitation</li> <li>◆ Seizure</li> <li>◆ Chest tightness</li> </ul> <p>ICD discharging recorded</p>          | <p>Medication</p> <ul style="list-style-type: none"> <li>◆ Metoprolol (47.5 mg per day oral)</li> <li>◆ Esmolol (1 g in 45 mL, 5 mL/hr IV)</li> <li>◆ Propranolol (40 mg, 3 times per day oral)</li> <li>◆ Amiodarone (450 mg in 41 mL, 9 mL/hr, IV)</li> </ul> <p>Device Treatment</p> <ul style="list-style-type: none"> <li>◆ Optimization of ICD operating parameters</li> </ul> <p>Medication after patient discharge</p> <ul style="list-style-type: none"> <li>◆ Propranolol (40 mg, 3 times per day oral)</li> <li>◆ Benazepril (10 mg daily)</li> </ul> | <p>Patient quality of life was severely deteriorated due to symptom relapse, ICD discharging</p>                                                    |
| Oct, 2017   | <p>Hospitalized for multiple times with the following symptoms:</p> <ul style="list-style-type: none"> <li>◆ Palpitation</li> <li>◆ Seizure</li> <li>◆ Chest tightness</li> </ul> <p>Frequent ICD discharging recorded</p> | <p>Medication</p> <ul style="list-style-type: none"> <li>◆ Metoprolol (47.5 mg per day oral)</li> <li>◆ Esmolol (1 g in 45 mL, 5 mL/hr IV)</li> <li>◆ Propranolol (60 mg, 3 times per day oral)</li> </ul> <p>Medication after patient discharge</p> <ul style="list-style-type: none"> <li>◆ Propranolol (60 mg, 3 times per day oral)</li> </ul>                                                                                                                                                                                                               | <p>Patient quality of life was severely deteriorated due to symptom relapse, ICD discharging</p>                                                    |
| 2018 onward | <p>LQTS symptoms relapse similar to 2017</p>                                                                                                                                                                               | <p>Verapamil (40 mg, 3 times per day, oral) added to treatment regime by 2018</p>                                                                                                                                                                                                                                                                                                                                                                                                                                                                                | <p>Symptom better controlled and ICD discharging frequency reduced since the use of Verapamil</p> <p>QT interval reduced as demonstrated by ECG</p> |

Supplementary Table S2: Verapamil Treatment of Cardiomyocytes - Individual Data Points

| Group         |           | Cell | APD30  | APD50  | APD90  |
|---------------|-----------|------|--------|--------|--------|
| Healthy donor | Control   | 01   | 256.40 | 322.00 | 367.36 |
|               |           | 02   | 340.56 | 418.43 | 472.29 |
|               |           | 03   | 164.20 | 263.80 | 339.52 |
|               |           | 04   | 119.98 | 275.18 | 392.99 |
|               |           | 05   | 48.97  | 199.60 | 295.52 |
|               |           | Mean | 186.02 | 295.80 | 373.54 |
|               |           | SD   | 114.52 | 81.28  | 65.98  |
|               | Verapamil | 01   | 104.59 | 183.28 | 243.41 |
|               |           | 02   | 210.00 | 272.96 | 311.28 |
|               |           | 03   | 78.51  | 154.93 | 239.80 |
|               |           | 04   | 47.17  | 187.33 | 362.60 |
|               |           | 05   | 7.59   | 76.34  | 190.96 |
|               |           | Mean | 89.57  | 174.97 | 269.61 |
|               |           | SD   | 76.44  | 70.63  | 67.35  |
| Patient       | Control   | 01   | 425.57 | 569.99 | 646.40 |
|               |           | 02   | 316.75 | 504.23 | 571.40 |
|               |           | 03   | 377.15 | 464.65 | 511.28 |
|               |           | 04   | 513.79 | 634.79 | 723.94 |
|               |           | 05   | 621.77 | 735.95 | 797.57 |
|               |           | Mean | 451.01 | 581.92 | 650.12 |
|               |           | SD   | 119.61 | 107.76 | 114.76 |
|               | Verapamil | 01   | 353.74 | 425.36 | 506.52 |
|               |           | 02   | 98.74  | 175.98 | 244.38 |
|               |           | 03   | 188.54 | 276.18 | 341.75 |
|               |           | 04   | 221.18 | 352.40 | 462.75 |
|               |           | 05   | 313.05 | 440.58 | 524.45 |
|               |           | Mean | 235.05 | 334.10 | 415.97 |
|               |           | SD   | 101.37 | 109.95 | 119.49 |

All APD values are in ms.

Supplementary Table S3: Lidocaine Treatment of Cardiomyocytes - Individual Data Points

| Group         |           | Cell | APD30  | APD50  | APD90  |
|---------------|-----------|------|--------|--------|--------|
| Healthy donor | Control   | 01   | 290.34 | 419.52 | 530.32 |
|               |           | 02   | 143.15 | 231.07 | 312.05 |
|               |           | 03   | 249.75 | 295.72 | 333.26 |
|               |           | 04   | 265.13 | 379.97 | 434.31 |
|               |           | 05   | 219.30 | 388.39 | 509.05 |
|               |           | Mean | 233.53 | 342.93 | 423.80 |
|               |           | SD   | 56.78  | 77.53  | 99.26  |
|               | Lidocaine | 01   | 101.83 | 233.74 | 365.99 |
|               |           | 02   | 8.36   | 53.30  | 158.07 |
|               |           | 03   | 109.55 | 192.15 | 236.65 |
|               |           | 04   | 98.04  | 223.16 | 297.64 |
|               |           | 05   | 27.04  | 188.27 | 369.98 |
|               |           | Mean | 68.96  | 178.12 | 285.67 |
|               |           | SD   | 47.44  | 72.46  | 89.98  |
| Patient       | Control   | 01   | 412.21 | 498.90 | 563.69 |
|               |           | 02   | 326.59 | 475.33 | 520.26 |
|               |           | 03   | 646.57 | 846.58 | 918.36 |
|               |           | 04   | 649.58 | 769.36 | 832.34 |
|               |           | 05   | 373.31 | 454.86 | 491.80 |
|               |           | Mean | 481.65 | 609.01 | 665.29 |
|               |           | SD   | 154.92 | 184.33 | 195.83 |
|               | Lidocaine | 01   | 250.17 | 325.44 | 387.68 |
|               |           | 02   | 278.58 | 374.77 | 420.77 |
|               |           | 03   | 474.57 | 619.35 | 686.91 |
|               |           | 04   | 554.32 | 631.89 | 694.20 |
|               |           | 05   | 288.35 | 341.56 | 381.44 |
|               |           | Mean | 369.20 | 458.60 | 514.20 |
|               |           | SD   | 136.28 | 153.56 | 161.70 |

All APD values are in ms.

**Supplementary Table S4: Material Suppliers and Material Catalog Numbers**

| No. | Material Name & Purpose                                                               | Supplier                                   | Outcomes & Remarks |
|-----|---------------------------------------------------------------------------------------|--------------------------------------------|--------------------|
| 01  | Vacutainer CPT                                                                        | BD Biosciences, Franklin Lakes, NJ, USA    | 362753             |
| 02  | CytoTune-iPS 2.0 Sendai Reprogramming Kit                                             | ThermoFisher Scientific, Waltham, MA, USA, | A16517             |
| 03  | mTeSR1 medium                                                                         | Stemcell Technologies                      | 85857              |
| 04  | Matrigel                                                                              | Corning, Corning, New York, USA            | 354230             |
| 05  | Accutase                                                                              | ThermoFisher Scientific, Waltham, MA, USA  | 1110501            |
| 06  | STEMdiff™ Trilineage Differentiation Kit                                              | Stemcell Technologies                      | 05230              |
| 07  | RPMI1640                                                                              | ThermoFisher Scientific, Waltham, MA, USA  | 11875093           |
| 08  | B27 no insulin                                                                        | ThermoFisher Scientific, Waltham, MA, USA  | A1895601           |
| 09  | B27                                                                                   | ThermoFisher Scientific, Waltham, MA, USA  | 17504044           |
| 10  | CHIR99021                                                                             | Sigma-Aldrich, Burlington, MA, USA         | SML1046            |
| 11  | IWR-1                                                                                 | Sigma-Aldrich, Burlington, MA, USA         | I0161              |
| 12  | FBS                                                                                   | ThermoFisher Scientific, Waltham, MA, USA  | 26140079           |
| 13  | Trypsin EDTA                                                                          | ThermoFisher Scientific, Waltham, MA, USA  | 25200056           |
| 14  | CryoStor CS10                                                                         | BioLife Solution                           | 210102             |
| 15  | Verapamil                                                                             | Sigma-Aldrich, Burlington, MA, USA         | V4629              |
| 16  | Lidocaine                                                                             | Sigma-Aldrich, Burlington, MA, USA         | L7757              |
| 17  | Anti-Oct3/4 antibody                                                                  | Abcam, Cambridge, UK                       | ab181557           |
| 18  | Donkey anti-Mouse IgG (H+L) Highly Cross-Adsorbed Secondary Antibody, Alexa Fluor 546 | ThermoFisher Scientific, Waltham, MA, USA  | A10036             |
| 19  | PE Mouse anti-SSEA4 (Clone MC813-70(RUO))                                             | BD Biosciences, Franklin Lakes, NJ, USA    | 560128             |
| 20  | PE Mouse IgG3, κ Isotype Control (Clone A112-3(RUO))                                  | BD Biosciences, Franklin Lakes, NJ, USA    | 559926             |
| 21  | PE Mouse anti-Oct3/4 (Clone 40/Oct-3(RUO))                                            | BD Biosciences, Franklin Lakes, NJ, USA    | 560186             |
| 22  | PE Mouse IgG1, κ Isotype Control (Clone MOPC-21(RUO))                                 | BD Biosciences, Franklin Lakes, NJ, USA    | 559320             |
| 21  | PE Mouse anti-human Nanog (Clone N31-355(RUO))                                        | BD Biosciences, Franklin Lakes, NJ, USA    | 560873             |
| 22  | PE Mouse IgG1, κ Isotype Control (Clone MOPC-21(RUO))                                 | BD Biosciences, Franklin Lakes, NJ, USA    | 554680             |

|    |                                                                                        |                                               |         |
|----|----------------------------------------------------------------------------------------|-----------------------------------------------|---------|
| 23 | Anti-alpha 1 Fetoprotein (AFP-01)                                                      | Abcam, Cambridge, UK                          | ab3980  |
| 24 | Brachyury Rabbit mAb                                                                   | Cell Signaling Technologies, Danvers, MA, USA | 81694   |
| 25 | Alexa Fluor® 488 Mouse anti-Human Pax-6 (Clone O18-1330(RUO))                          | BD Biosciences, Franklin Lakes, NJ, USA       | 561664  |
| 26 | Donkey anti-Mouse IgG (H+L) Highly Cross-Adsorbed Secondary Antibody, Alexa Fluor 546  | ThermoFisher Scientific, Waltham, MA, USA     | A10036  |
| 27 | Donkey anti-Rabbit IgG (H+L) Highly Cross-Adsorbed Secondary Antibody, Alexa Fluor 488 | ThermoFisher Scientific, Waltham, MA, USA     | A21206  |
| 28 | Anti-cTnT                                                                              | Abcam, Cambridge, UK                          | ab45932 |
| 29 | Anti-alpha Actinin                                                                     | Abcam, Cambridge, UK                          | ab68194 |
| 30 | Donkey anti-Mouse IgG (H+L) Highly Cross-Adsorbed Secondary Antibody, Alexa Fluor 546  | ThermoFisher Scientific, Waltham, MA, USA     | A10036  |
| 31 | Hoechst 33342                                                                          | ThermoFisher Scientific, Waltham, MA, USA     | H3570   |
| 32 | PE Mouse Anti-Cardiac Troponin T                                                       | ThermoFisher Scientific, Waltham, MA, USA     | 564767  |
| 33 | PE Mouse IgG1, κ Isotype Control                                                       | BD Biosciences, Franklin Lakes, NJ, USA       | 554680  |
